# Supplementary material for: Systems-wide analysis of BCR signalosomes and downstream phosphorylation and ubiquitylation
Source: PubMed Central journal article supplement (PMC4501846; doi:10.15252/msb.20145880), 2015-06-02
Supplement: msb0011-0810-sd1.pdf [file msb0011-0810-sd1.pdf]

## **Systems-wide analysis of BCR signalosomes and downstream phosphorylation and ubiquitylation**

Shankha Satpathy<sup>1,§</sup>, Sebastian A. Wagner<sup>1,5,§</sup>, Petra Beli<sup>1,6</sup>, Rajat Gupta<sup>1</sup>, Trine Kristiansen<sup>1,7</sup>, Dessislava Malinova<sup>2</sup>, Chiara Francavilla<sup>1</sup>, Pavel Tolar<sup>2</sup>, Gail A. Bishop<sup>3</sup>, Bruce S. Hostager<sup>4</sup>, Chunaram Choudhary<sup>1,\*</sup>

### **Supplementary figure and table legends**

**Supplementary Figure 1:** Relative quantification of BCR receptor components. The cumulative intensities of BCR components in the signalosomes isolated after 5 and 15 minutes of the receptor activation. The bar chart shows the ratios of cumulative peptide intensities for the indicated BCR components in the signalosomes isolated at 5 (M) and 15 minutes (H). The data are shown for four individual experiments (Exp1- 4).

**Supplementary Figure 2:** Reproducibility of BCR signalosome, phosphoproteome and ubiquitylome. **(A)** Overlap between BCR signalosome components identified in four experiments. The Venn diagram shows the overlap between proteins that were enriched in BCR signalosomes in four different experiments (Exp1-4). **(B, C)** Correlation between experimental replicates for phosphoproteome and ubiquitylome. Pearson correlation coefficient between two independent biological replicates was calculated for the BCR phosphoproteome **(B)** and ubiquitylome **(C)**.

**Supplementary Figure 3:** Regulation of tyrosine phosphorylation in BCR signaling. **(A)** Tyrosine phosphorylation is more robustly upregulated compared to serine and threonine phosphorylation. The significance between the magnitude of up-regulated phosphorylated serine/threonine and tyrosine sites was calculated using Wilcoxon test. The box represents the middle 50% of the distribution and the line within the box represents the median value of the distribution. **(B)** Time-dependent decrease in BCR-induced tyrosine phosphorylation. The line graph shows mean SILAC ratios of tyrosine or serine/threonine phosphorylated peptides after 5 and 15 minutes of BCR stimulation. The mean SILAC ratio of tyrosine phosphorylation showed a decrease between 5 and 15 minutes, whereas there was no

change for serine/threonine phosphorylation. (C) A network view of BCR-regulated tyrosine phosphorylated proteins. The size of node reflects the number of phosphorylation sites on each protein and the color indicates  $\log_2$  SILAC ratios of proteins with BCR-regulated (up or down) tyrosine phosphorylation.

**Supplementary Figure 4:** Subcellular localization of GFP-RAB7A WT in HeLa cells. Cells were transfected with GFP-tagged RAB7A. Cells were fixed, permeabilized, and stained  $\alpha$ -LAMP1 antibodies to detect the endogenous LAMP1.

**Supplementary Figure 5:** Overlap between proteins identified from TUBE pull-down and di-Gly enrichment. (A) The Venn diagram shows the overlap between all proteins that were identified from TUBE pull-down and di-Gly enrichment experiments. (B) The Venn diagram shows the overlap of proteins that contained BCR-induced ubiquitylation (SILAC ratio  $\geq 2$ ) in TUBE pull-downs and di-Gly enrichment dataset.

**Supplementary Figure 6:** Enrichment of BCL10 and Met1-UB-specific peptide in TUBE and Met1-SUB pull-downs, and activation of NF- $\kappa$ B by BCL10 and linear ubiquitin fusion protein. (A) The enrichment of Met1-UB-specific peptide (GGMQIVK) in higher molecular weight gel fractions. A20 cells were stimulated with anti-IgG and ubiquitylated proteins were affinity enriched from unstimulated and BCR-stimulated cells using TUBEs (A), or Met1-SUB (B). Proteins were separated on SDS-PAGE and quantified by SILAC-based mass spectrometry. The table in the panel A includes the results from TUBE-based enrichment and shows the number of gel fractions analyzed, the corresponding molecular weight of proteins present in these fractions, and the relative enrichment of Met1-UB-specific peptide in BCR-stimulated cells compared to unstimulated cells, in individual gel fractions. The table in the panel B contains the results from Met1-SUB pull-downs and shows the number of gel fractions analyzed, the corresponding molecular weight of proteins present in these fraction, and the relative enrichment of Met1-UB-specific peptide and BCL10 in BCR-stimulated cells compared to unstimulated cells, in each gel fraction. The SILAC ratio indicates the median of quantified peptides. (C) Expression of BCL10 and BCL10-LinUBL73P-4X in HEK293T cells. HEK293T cells were transfected with plasmids encoding BCL10 or BCL10-LinUBL73P-4X. Cell lysates were immunoblotted against BCL10. (D) Activation of NF- $\kappa$ B reporter activity by BCL10 and BCL10-UB2

fusion proteins. HEK293T cells were co-transfected with increasing amounts (0.5µg, 1 µg, or 2 µg) of BCL10, or BCL10-UB<sub>2</sub> construct together with pNF-κB Luc and pRL-TK Renilla. NF-κB transcriptional activity was measured 24 hours later using Dual-Glo® Luciferase Assay System (Promega). Error bars indicate mean ±SEM of 2 independent experiments. Statistical significance was determined by two-tailed Student's t-test.

**Supplementary Table S1:** A list of proteins quantified in BCR signalosome analysis (SILAC L= unstimulated, SILAC M = 5 minutes BCR stimulation, SILAC H =15 minutes BCR stimulation).

**Supplementary Table S2:** A list of all phosphorylation sites quantified after BCR stimulation (SILAC L= unstimulated, SILAC M = 5 minutes BCR stimulation, SILAC H =15 minutes BCR stimulation).

**Supplementary Table S3:** A list of protein kinases and ubiquitin ligases that were phosphorylated after BCR stimulation (SILAC L= unstimulated, SILAC M = 5 minutes BCR stimulation, SILAC H =15 minutes BCR stimulation).

**Supplementary Table S4:** A list of GOBP terms that were enriched in proteins containing BCR-upregulated phosphorylation sites.

**Supplementary Table S5:** A list of proteins quantified in the GFP-RAB7A and RAB7A mutant pull-downs.

**Supplementary Table S6:** A list of all di-Gly modified (ubiquitylation) sites quantified after BCR stimulation (SILAC L= unstimulated, SILAC M = 5 minutes BCR stimulation, SILAC H =15 minutes BCR stimulation).

**Supplementary Table S7:** A list of all GO terms enriched in BCR-upregulated di-Gly modification dataset.

**Supplemental Table S8:** A list of BCR signalosome components that were also ubiquitylated in response to BCR stimulation (SILAC L= unstimulated, SILAC M = 5 minutes BCR stimulation, SILAC H =15 minutes BCR stimulation).

**Supplemental Table S9:** A list of proteins that were concurrently modified with BCR-upregulated phosphorylation and ubiquitylation (SILAC L= unstimulated, SILAC M = 5 minutes BCR stimulation, SILAC H =15 minutes BCR stimulation).

**Supplementary Table S10:** A list of proteins quantified in TUBE-based pull-downs after BCR stimulation (SILAC L= unstimulated, SILAC M = 5 minutes BCR stimulation, SILAC H =15 minutes BCR stimulation).

**Supplementary Table S11:** A list of proteins quantified in Met-1 SUB-based pull-downs after BCR stimulation (SILAC L= unstimulated, SILAC M = 5 minutes BCR stimulation, SILAC H =15 minutes BCR stimulation).

**Supplemental Table S12.** A list of antibodies used in this study.

# Supplemental Figure S1

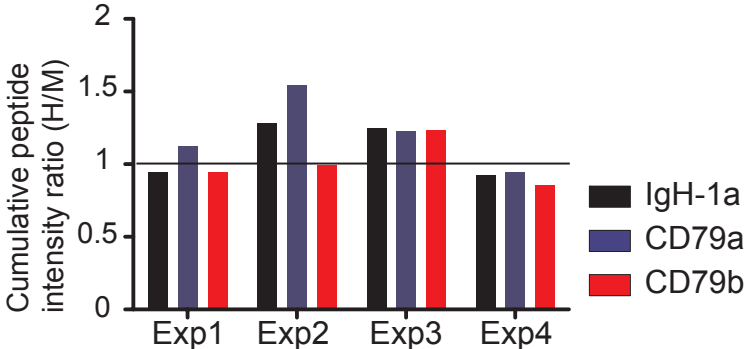

# Supplemental Figure S2

**A**

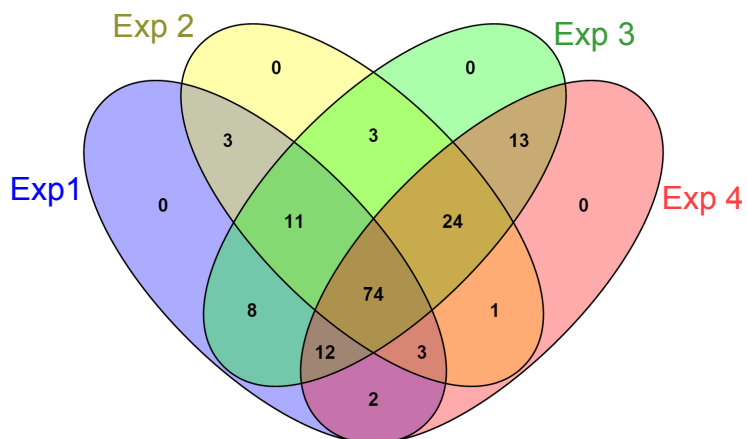

**B**

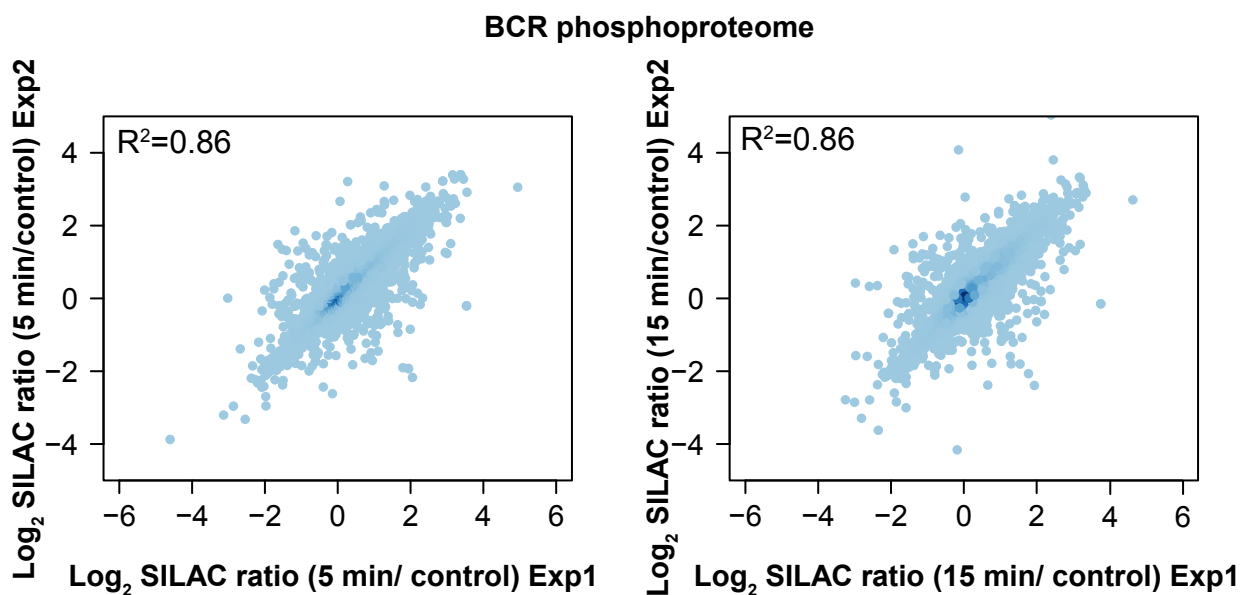

**C**

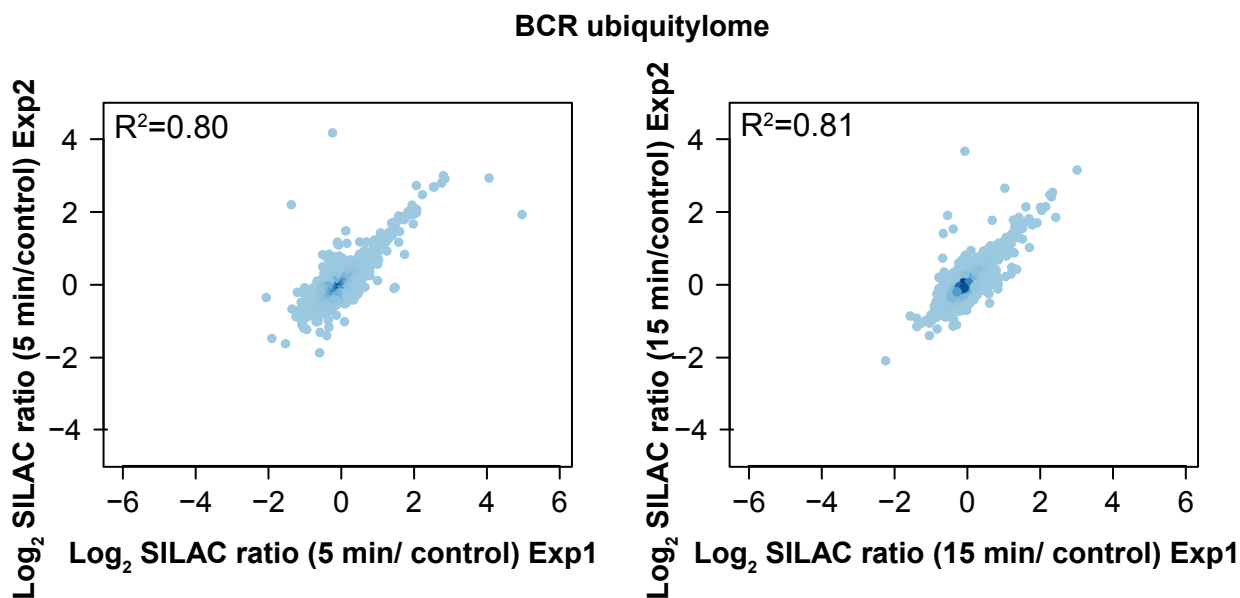

# Supplemental Figure S3

**A**

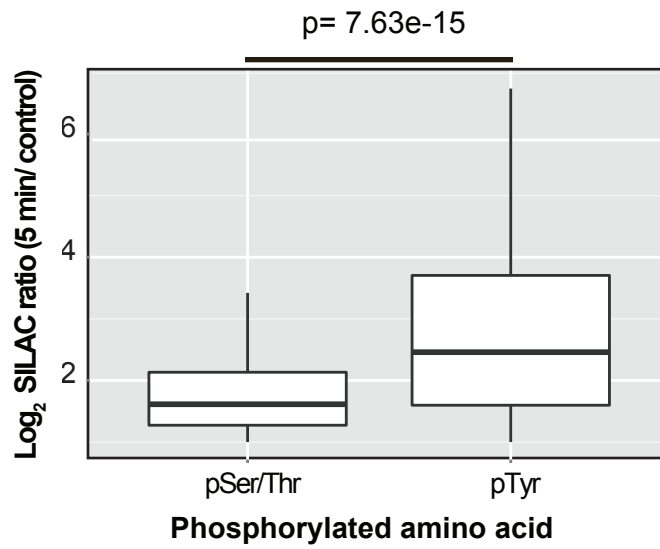

**B**

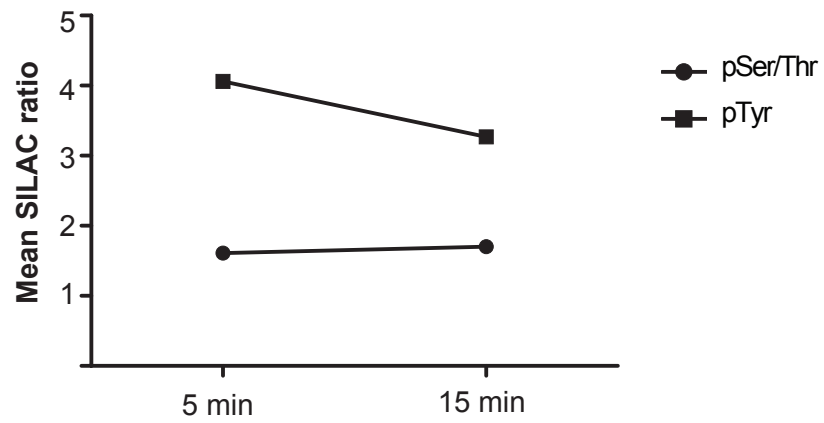

**C**

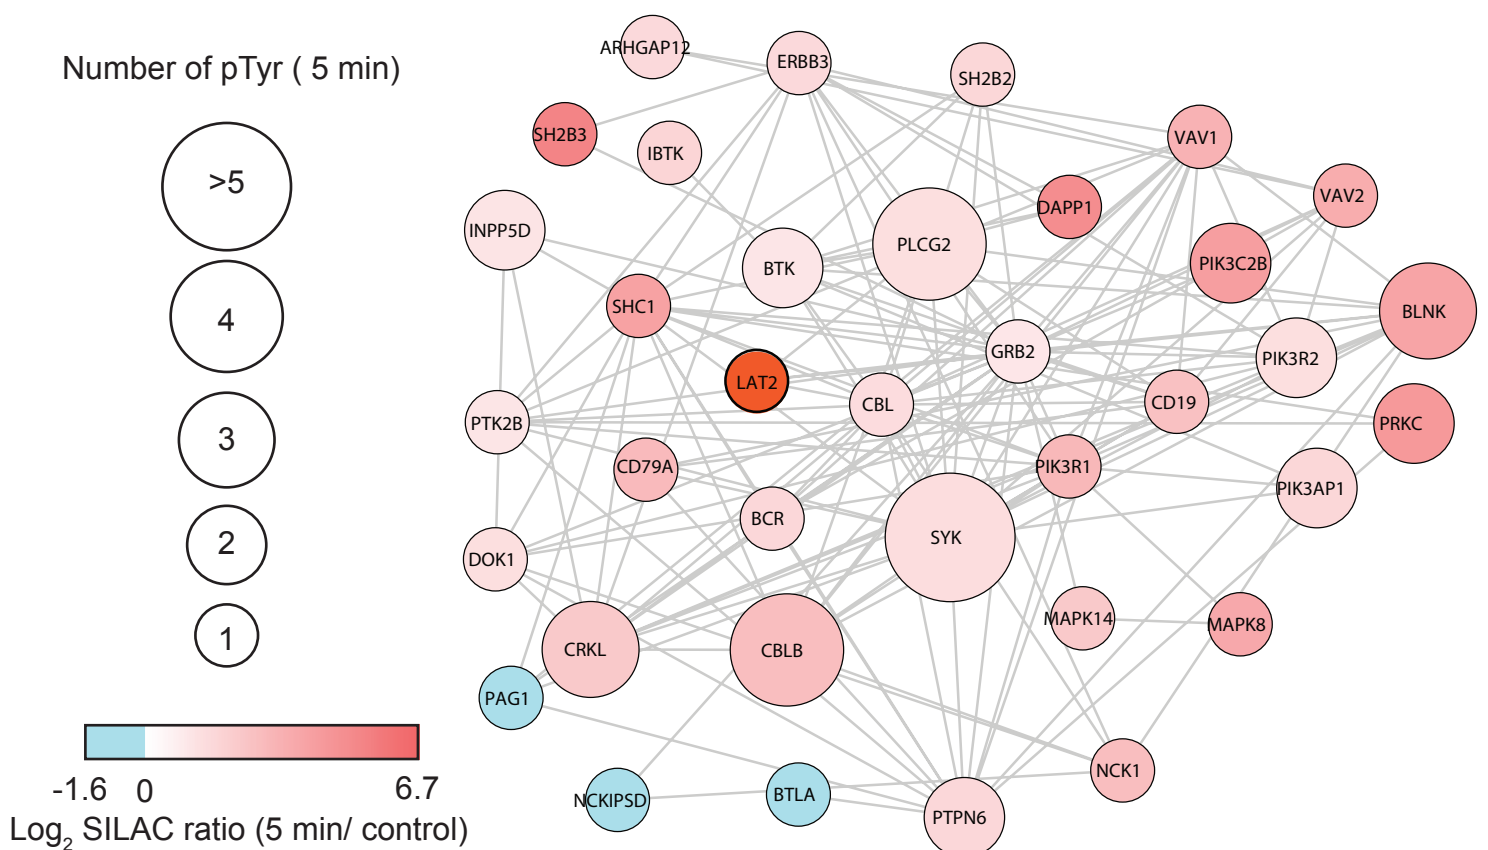

# Supplemental Figure S4

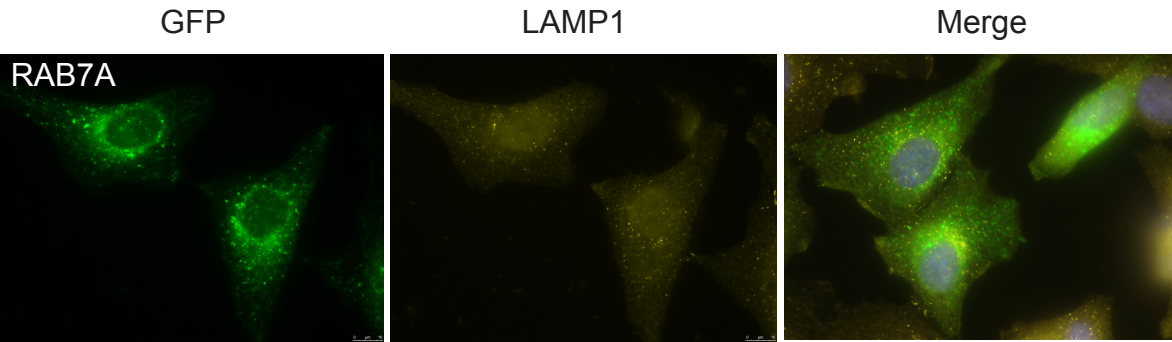



# Supplemental Figure 5

## A Number of proteins quantified

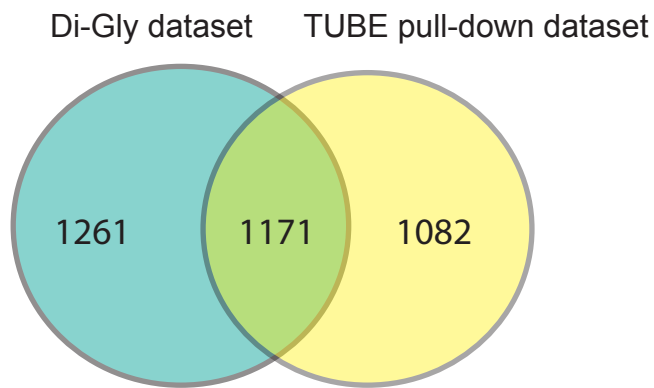

## B Number of proteins with BCR-upregulated ubiquitylation

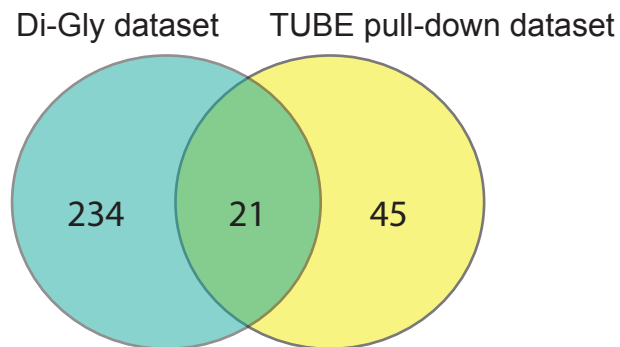

# Supplemental Figure S6

**A**

TUBE pull-down

| SDS-PAGE fraction | MW      | SILAC ratio: Met1-UB |        |
|-------------------|---------|----------------------|--------|
|                   |         | 5 min                | 15 min |
| 1                 | >110    | 1.8                  | 2.1    |
| 2                 | ~110-70 | 1.8                  | 2.3    |
| 3                 | ~70-53  | 2.1                  | 2.9    |
| 4                 | ~53-40  | N/A                  | N/A    |
| 5,6,7             | <40     | 2                    | 1.8    |

**B**

Met1-SUB pull-down

| SDS-PAGE fraction | MW     | SILAC ratio: BCL10 |        | SILAC ratio: Met1-UB |        |
|-------------------|--------|--------------------|--------|----------------------|--------|
|                   |        | 5 min              | 15 min | 5 min                | 15 min |
| 1                 | >70    | 4.4                | 10.2   | 1.5                  | 2.1    |
| 2                 | ~53-70 | 13.7               | 8.6    | N/A                  | N/A    |
| 3                 | ~30-53 | 12.1               | 8.4    | 3.5                  | 2.9    |
| 4                 | <30    | 4.7                | 1.9    | N/A                  | N/A    |

**C**

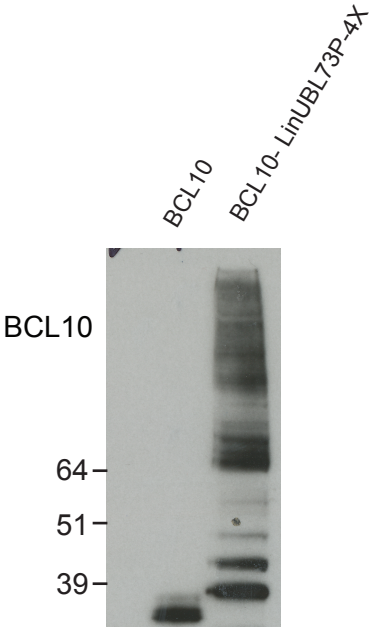

**D**

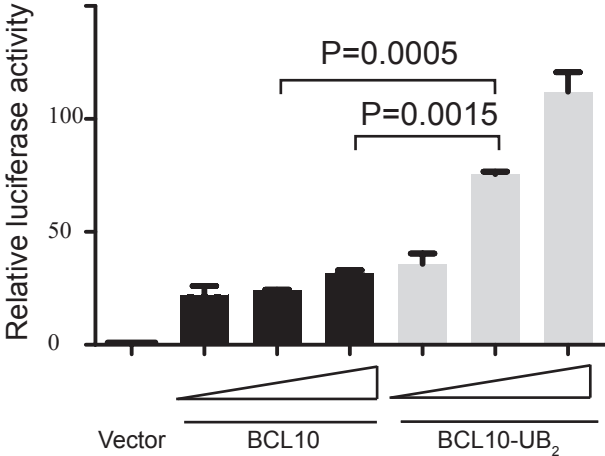

**Supplemental Table S12.** A list of antibodies used in this study.

| <b>Antibody</b>                              | <b>Catalog no.</b> | <b>Company</b>                        |
|----------------------------------------------|--------------------|---------------------------------------|
| <b>BCL10</b>                                 | #C78F1, #5273      | Cell Signaling Technology, Santa Cruz |
| <b>LUB9</b>                                  | #AB130             | Life Sensors                          |
| <b>ACTIN</b>                                 | #A2228             | Sigma                                 |
| <b>UBIQUITIN</b>                             | #8017              | Santa Cruz                            |
| <b>FLAG</b>                                  | #F1804             | Sigma                                 |
| <b>I<math>\kappa</math>B</b>                 | #9242              | Cell Signaling Technology             |
| <b>p-I<math>\kappa</math>B</b>               | #2859              | Cell Signaling Technology             |
| <b>LAMP1</b>                                 | #ab24170           | Abcam                                 |
| <b>BTK</b>                                   | #3533              | Cell Signaling Technology             |
| <b>p-BTK</b>                                 | #5082              | Cell Signaling Technology             |
| <b>AKT</b>                                   | #9272              | Cell Signaling Technology             |
| <b>p-AKT</b>                                 | #9271              | Cell Signaling Technology             |
| <b>ERK1</b>                                  | #M7927             | Sigma                                 |
| <b>p44/42 MAPK (ERK1/2) (T202/Y204)(E10)</b> | #9106              | Cell Signaling Technology             |
| <b>SYK</b>                                   | #13198             | Cell Signaling Technology             |
| <b>LYN</b>                                   | #2732              | Cell Signaling Technology             |
| <b>p85 PI3K</b>                              | #4257              | Cell Signaling Technology             |
| <b>ITCH</b>                                  | #12117             | Cell Signaling Technology             |
